# Supplementary material for: Patterns of Mass Mortality among Rocky Shore Invertebrates across 100 km of Northeastern Pacific Coastline
Source: PubMed Central journal article supplement (PMC4454560; doi:10.1371/journal.pone.0126280), 2015-06-03
Supplement: pone.0126280.s003.pdf [file pone.0126280.s003.pdf]

**S1 Table.** Detail of site locations, types and dates of surveys, special jurisdictions and relevant permits.

| Site # | Latitude (°N) | Longitude (°W) | Site Name                            | Research use  |
|--------|---------------|----------------|--------------------------------------|---------------|
| 1      | 39.28122      | 123.80381      | Van Damme State Park <sup>a</sup>    | B             |
| 2      | 38.91504      | 123.71107      | Arena Cove                           | B, D          |
| 3      | 38.88121      | 123.67773      | Moat Creek                           | B, D, F       |
| 4      | 38.84939      | 123.64752      | Iversen Point <sup>b</sup>           | B, D, F       |
| 5      | 38.80187      | 123.58371      | Anchor Bay                           | C             |
| 6      | 38.79659      | 123.57196      | Serenisea                            | B, C, D       |
| 7      | 38.74103      | 123.50823      | Del Mar Landing <sup>b</sup>         | C, D, F       |
| 8      | 38.70013      | 123.44271      | Sea Ranch                            | A, C, D, F    |
| 9      | 38.59687      | 123.35058      | Fisk Mill Cove <sup>a</sup>          | C, D, F       |
| 10     | 38.58653      | 123.34218      | Phillips Gulch <sup>a</sup>          | A, B, C, D, F |
| 11     | 38.56412      | 123.33283      | Salt Point <sup>a,b</sup>            | E             |
| 12     | 38.55436      | 123.30727      | Ocean Cove                           | E             |
| 13     | 38.53065      | 123.27657      | Timber Cove                          | E             |
| 14     | 38.52501      | 123.26846      | Windermere Point                     | A, B, C, D, F |
| 15     | 38.51063      | 123.24713      | Fort Ross <sup>b</sup>               | E             |
| 16     | 38.45864      | 123.14609      | Twin Coves <sup>a</sup>              | A, B, C, D    |
| 17     | 38.41784      | 123.10772      | Shell Beach <sup>a</sup>             | C, D          |
| 18     | 38.31844      | 123.07403      | Bodega Marine Reserve <sup>b,c</sup> | A, B, C, D, F |
| 19     | 38.30336      | 123.05275      | Bodega Head <sup>a</sup>             | C, D, F       |
| 20     | 38.24049      | 122.99535      | Tomales Point <sup>d</sup>           | C             |
| 21     | 38.18232      | 122.96551      | McClure's Beach <sup>d</sup>         | C, D          |
| 22     | 37.99679      | 122.97919      | Lifeboat House <sup>d</sup>          | C, D          |
| 23     | 37.93102      | 122.74950      | Palomarin <sup>d</sup>               | B, D          |
| 24     | 37.89309      | 122.70677      | Duxbury Reef <sup>b</sup>            | B, D, F       |

Research uses are for the following surveys (A) Initial observations of mortality in previously abundant *S. purpuratus* populations visited before the event (May–July 2011) and after (Aug–Sep 2011); (B) Initial urchin density surveys conducted Oct–Dec 2011; (C) Fine-grained urchin survivorship surveys: Dec 2011–Dec 2012; (D) Post-event multi-species surveys: Dec 2011–Dec 2013; (E) Subtidal surveys: Aug and Sept 2005–2012 and (F) Pre-event intertidal monitoring surveys, with the last surveys conducted at all sites before the event May–Aug 2010, except Duxbury Reef, last surveyed in Feb 2008. Additional prior surveys were conducted at Sea Ranch in 2001 and 2005, and at Bodega Marine Reserve in 2001, 2003, and 2004.

Bedrock types by site number: 1–8, consolidated mudstone; 9–15, consolidated sandstone and conglomerate; 16 and 17, graywacke and Franciscan mélangé; 18–21, granite and diorite; 22, siltstone and mudstone; 23, mudstone, sandstone and soft shale; 24, soft shale.

<sup>a</sup> Locations are within California State Parks; annual permits issued to LJJ by California Department of Parks and Recreation.

<sup>b</sup> Protected as a Marine Protected Area per California Marine Life Protection Act of 1999 (California Department of Fish and Wildlife permits # SC-11596 LJJ, SC-11794 LMS, SC-630 MND).

<sup>c</sup> Location is managed by the University of California Natural Reserve System; permit #26493 to LJJ.

<sup>d</sup> Locations are within Point Reyes National Seashore.
