# Supplementary material for: Patterns of Mass Mortality among Rocky Shore Invertebrates across 100 km of Northeastern Pacific Coastline
Source: PubMed Central journal article supplement (PMC4454560; doi:10.1371/journal.pone.0126280), 2015-06-03
Supplement: pone.0126280.s004.pdf [file pone.0126280.s004.pdf]

**S2 Table.** Counts of *Leptasterias* sp. found in pre-2011 monitoring surveys and 2012 post-event surveys at many of the same sites, in 0.25 m<sup>2</sup> quadrats placed randomly in mid-to-low intertidal zones. All zeros correspond to post-event samples within the die-off zone.

| Site Name             | Site Latitude | Site Number <sup>a</sup> | Survey year | Count | Area surveyed (m <sup>2</sup> ) |
|-----------------------|---------------|--------------------------|-------------|-------|---------------------------------|
| Point Arena           | 38.943        | NA                       | 2010        | 12    | 3                               |
| Stornetta             | 38.938        | NA                       | 2004        | 12    | 5.5                             |
| Stornetta             | 38.938        | NA                       | 2007        | 10    | 3                               |
| Arena Cove            | 38.915        | 2                        | 2012        | 7     | 13.25                           |
| Moat Creek            | 38.881        | 3                        | 2010        | 10    | 4                               |
| Moat Creek            | 38.881        | 3                        | 2012        | 20    | 25                              |
| Iversen/Saunders Reef | 38.850        | 4                        | 2010        | 6     | 6                               |
| Iversen/Saunders Reef | 38.850        | 4                        | 2012        | 2     | 40.25                           |
| Del Mar Landing       | 38.741        | 7                        | 2010        | 20    | 5.5                             |
| Del Mar Landing       | 38.741        | 7                        | 2012        | 0     | 32                              |
| Sea Ranch             | 38.730        | 8                        | 2001        | 28    | 5.5                             |
| Sea Ranch             | 38.730        | 8                        | 2005        | 16    | 5.5                             |
| Sea Ranch             | 38.730        | 8                        | 2010        | 7     | 3                               |
| Sea Ranch             | 38.730        | 8                        | 2012        | 0     | 34                              |
| Phillips Gulch        | 38.586        | 9                        | 2010        | 9     | 3                               |
| Phillips Gulch        | 38.586        | 9                        | 2012        | 0     | 32                              |
| Gerstle Cove          | 38.566        | 11                       | 2010        | 8     | 3                               |
| Windermere Point      | 38.524        | 14                       | 2010        | 4     | 5.5                             |
| Windermere Point      | 38.524        | 14                       | 2012        | 0     | 32                              |
| Bodega Marine Reserve | 38.318        | 18                       | 2001        | 124   | 5.5                             |
| Bodega Marine Reserve | 38.318        | 18                       | 2003        | 65    | 5.5                             |
| Bodega Marine Reserve | 38.318        | 18                       | 2004        | 31    | 3                               |
| Bodega Marine Reserve | 38.318        | 18                       | 2010        | 17    | 3                               |
| Bodega Marine Reserve | 38.318        | 18                       | 2012        | 0     | 26                              |
| Bodega Head           | 38.303        | 19                       | 2010        | 21    | 5.5                             |
| Bodega Head           | 38.303        | 19                       | 2012        | 0     | 37                              |
| Santa Maria Creek     | 38.012        | NA                       | 2002        | 10    | 5.5                             |
| Chimney Rock          | 37.994        | NA                       | 2010        | 6     | 3                               |
| Bolinas Point         | 37.905        | NA                       | 2002        | 4     | 5.5                             |
| Bolinas Point         | 37.905        | NA                       | 2005        | 7     | 5.5                             |
| Bolinas Point         | 37.905        | NA                       | 2008        | 5     | 5.5                             |
| Bolinas Point         | 37.903        | NA                       | 2005        | 2     | 7.25                            |
| Palomarin             | 37.931        | 23                       | 2012        | 1     | 35.5                            |
| Duxbury Reef          | 37.893        | 24                       | 2008        | 1     | 3                               |
| Duxbury Reef          | 37.893        | 24                       | 2012        | 16    | 27.25                           |

<sup>a</sup>Site numbers are given for locations included in the 2012 post-event surveys.
