# Supplementary material for: Patterns of Mass Mortality among Rocky Shore Invertebrates across 100 km of Northeastern Pacific Coastline
Source: PubMed Central journal article supplement (PMC4454560; doi:10.1371/journal.pone.0126280), 2015-06-03
Supplement: pone.0126280.s005.pdf [file pone.0126280.s005.pdf]

**S3 Table.** Counts of *P. ochraceus* and *C. stelleri* in swath transects at 13 sites.

| Site # | Site Name        | Swath date | Area surveyed (m <sup>2</sup> ) | Inside kill zone <sup>a</sup> | Count <i>P. ochraceus</i> | Count <i>C. stelleri</i> |
|--------|------------------|------------|---------------------------------|-------------------------------|---------------------------|--------------------------|
| 3      | Moat Creek       | 09-Dec-12  | 1444                            | No                            | 26                        | 15                       |
| 4      | Iversen Point    | 16-Dec-12  | 1919                            | No                            | 23                        | 27                       |
| 5      | Serenisea        | 15-Dec-12  | 1857                            | Yes                           | 66                        | 25                       |
| 8      | Sea Ranch        | 17-Nov-12  | 1087                            | Yes                           | 25                        | 4                        |
| 9      | Fisk Mill Cove   | 16-Nov-12  | 831                             | Yes                           | 28                        | 0                        |
| 10     | Phillips Gulch   | 14-Dec-12  | 1788                            | Yes                           | 71                        | 28                       |
| 14     | Windermere Point | 12-Nov-12  | 3736                            | Yes                           | 12                        | 3                        |
| 16     | Twin Coves       | 13-Dec-12  | 2080                            | Yes                           | 36                        | 19                       |
| 17     | Shell Beach      | 13-Nov-12  | 2799                            | Yes                           | 0                         | 0                        |
| 19     | Bodega Head      | 12-Dec-12  | 2357                            | Yes                           | 39                        | 2                        |
| 22     | Lifeboat House   | 10-Dec-12  | 2019                            | *                             | 546                       | 0                        |
| 23     | Palomarin        | 11-Dec-12  | 2317                            | No                            | 143                       | 0                        |
| 24     | Duxbury Reef     | 14-Nov-12  | 3134                            | No                            | 30                        | 0                        |

Counts are of individuals found in 2012, in large swath transects with dates, area surveyed and location relative to zone of purple urchin loss.

<sup>a</sup> Kill zone defined by the loss of large urchin populations and *Leptasterias* sp.

\*No pre-HAB urchin population
