# Supplementary material for: Patterns of Mass Mortality among Rocky Shore Invertebrates across 100 km of Northeastern Pacific Coastline
Source: PubMed Central journal article supplement (PMC4454560; doi:10.1371/journal.pone.0126280), 2015-06-03
Supplement: pone.0126280.s006.pdf [file pone.0126280.s006.pdf]

**S4 Table.** Counts of *Henricia* sp. in quadrats with locations, area and dates surveyed.

| Site             | Latitude (°N) | Longitude (°W) | Inside kill zone <sup>a</sup> | Date of first survey | Re-survey date | 2012 count | 2013-14 count | 2012 total area (m <sup>2</sup> ) | 2013-14 total area (m <sup>2</sup> ) |
|------------------|---------------|----------------|-------------------------------|----------------------|----------------|------------|---------------|-----------------------------------|--------------------------------------|
| Van Damme SP     | 39.2803       | 123.8034       | N                             | 01-Jan-14            | NA             | NA         | 0             | NA                                | 37                                   |
| Stornetta        | 38.9349       | 123.7262       | N                             | 31-Dec-13            | NA             | NA         | 15            | NA                                | 37                                   |
| Arena Cove       | 38.9128       | 123.7108       | N                             | 12-Nov-12            | 02-Dec-13      | 2          | 44            | 5                                 | 21                                   |
| Moat Creek       | 38.8801       | 123.6751       | N                             | 9-Dec-12             | 30-Dec-13      | 0          | 10            | 1                                 | 28                                   |
| Iversen Point    | 38.8484       | 123.6467       | N                             | 16-Dec-12            | 02-Jan-14      | 0          | 7             | 20                                | 37                                   |
| Serenisea        | 38.7977       | 123.5728       | Y                             | 15-Dec-12            | 28-Jan-14      | 0          | 0             | 19                                | 38                                   |
| Del Mar Landing  | 38.7410       | 123.5082       | Y                             | 15-Nov-12            | 01-Dec-13      | 0          | 0             | 12                                | 32                                   |
| Sea Ranch        | 38.7001       | 123.4427       | Y                             | 17-Nov-12            | 29-Jan-14      | 1          | 0             | 14                                | 34                                   |
| Fisk Mill Cove   | 38.5969       | 123.3506       | Y                             | 16-Nov-12            | 03-Jan-14      | 0          | 0             | 11                                | 35                                   |
| Phillips Gulch   | 38.5865       | 123.3422       | Y                             | 14-Dec-12            | 30-Jan-14      | 0          | 0             | 16                                | 32                                   |
| Windermere Point | 38.5250       | 123.2685       | Y                             | 12-Nov-12            | 05-Dec-13      | 0          | 0             | 14                                | 32                                   |
| Twin Coves       | 38.4586       | 123.1461       | Y                             | 13-Dec-12            | 31-Jan-14      | 0          | 0             | 20                                | 40                                   |
| Shell Beach      | 38.4178       | 123.1077       | Y                             | 13-Nov-12            | 06-Dec-13      | 0          | 0             | 12                                | 40                                   |
| Bodega Reserve   | 38.3197       | 123.0749       | Y                             | 16-Oct-12            | 04-Jan-14      | 0          | 0             | 1                                 | 26                                   |
| Bodega Head      | 38.3034       | 123.0528       | Y                             | 12-Dec-12            | 04-Dec-13      | 0          | 0             | 17                                | 37                                   |
| McClures Beach   | 38.1823       | 122.9655       | *                             | 27-May-13            | 01-Feb-14      | NA         | 0             | 20                                | 28                                   |
| Lifeboat House   | 37.9969       | 122.9796       | *                             | 10-Dec-12            | 15-May-14      | 0          | 0             | 15                                | 38                                   |
| Palomarin        | 37.9310       | 122.7495       | N                             | 11-Dec-12            | 29-Dec-13      | 1          | 1             | 18                                | 38                                   |
| Duxbury Reef     | 37.8931       | 122.7068       | N                             | 14-Nov-12            | 03-Dec-13      | 2          | 7             | 12                                | 32                                   |
| Pigeon Point     | 37.1827       | 122.3888       | N                             | 24-Jun-13            | NA             | NA         | 5             | NA                                | 18                                   |
| Scott Creek      | 37.0442       | 122.2352       | N                             | 25-Jun-13            | NA             | NA         | 2             | NA                                | 19                                   |
| Andrew Molera SP | 36.2805       | 121.8634       | N                             | 23-Jun-13            | NA             | NA         | 2             | NA                                | 13                                   |

Animals found in 50 cm by 50 cm quadrats in surveys conducted between 2012 and 2014, with dates, area surveyed and site locations.

<sup>a</sup> Kill zone defined by the loss of large urchin populations and *Leptasterias* sp.

\*No urchin population at this location prior to the mass mortality.
